# Supplementary material for: Creation of Mo/Tc@C60and Au@C60and molecular-dynamics simulations
Source: Royal Society of Chemistry journal article supplement (doi:10.1039/d0ra10196f), 2021-01-01
Supplement: d0ra10196f5.pdf [file d0ra10196f5.pdf]

Uploaded the attached four xyz files as Supplementary Materials.

Followings are the brief explanations for these files:

MD\_Mo\_previous.xyz ... MD trajectory of Mo insertion with 40 eV (Fig.3: 0-191 fs)  
visualizable with VMD.

MD\_Mo\_continue.xyz ... MD trajectory of Mo insertion with 40 eV (continued: 192-581 fs)  
visualizable with VMD.

Due to the periodic boundary condition of the simulation cell box, a part of C60 penetrates the cell boundary and appears from the opposite boundary.

MD\_Au\_previous.xyz ... MD trajectory of Au insertion with 80 eV (Fig.5: 0-249 fs)  
visualizable with VMD.

MD\_Au\_continue.xyz ... MD trajectory of Au insertion with 80 eV (continued: 250-767 fs)  
visualizable with VMD.

Due to the periodic boundary condition of the simulation cell box, a part of C60 penetrates the cell boundary and appears from the opposite boundary.
